# Supplementary material
Source: PubMed Central journal article supplement (PMC2292672)

# Supplemental Figure 1

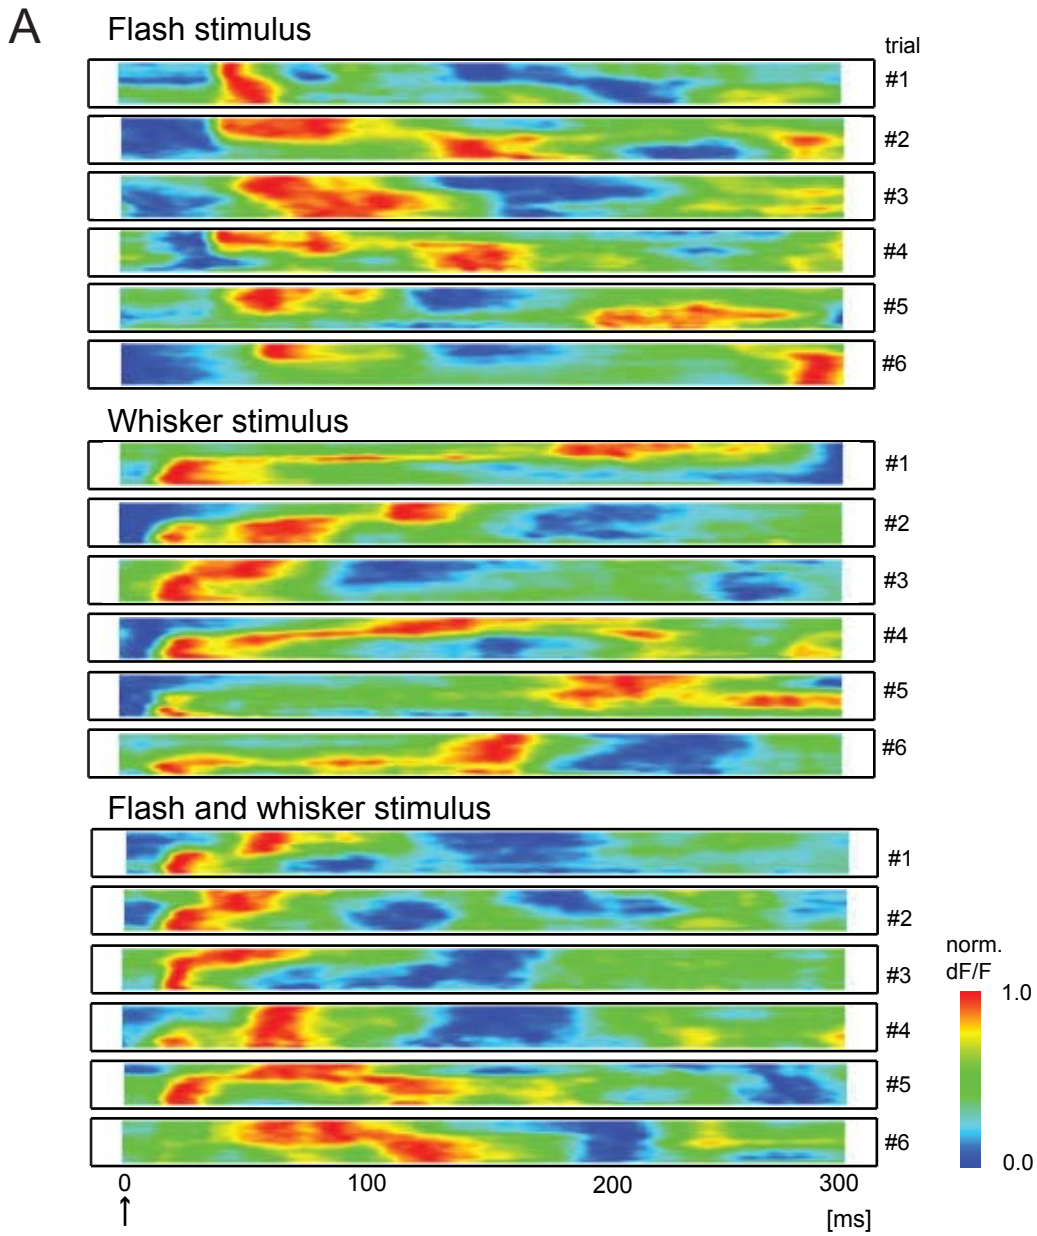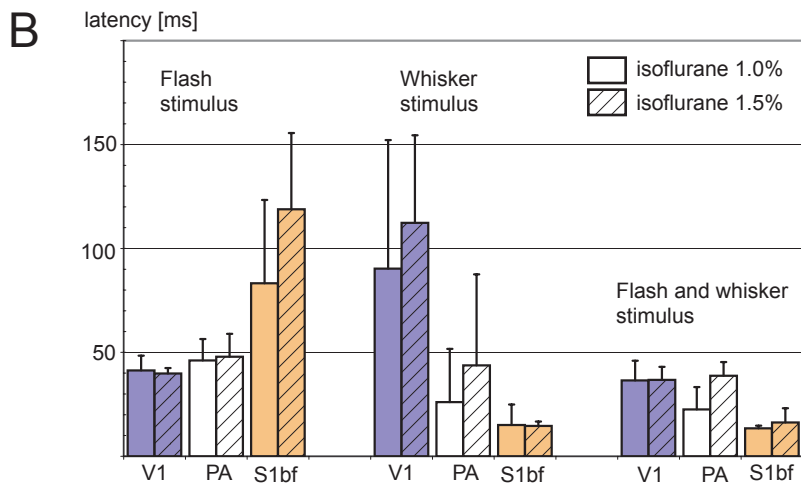

Supplement: NIHMS44620-supplement-02.pdf [file NIHMS44620-supplement-02.pdf]

# Supplemental Figure 2

A

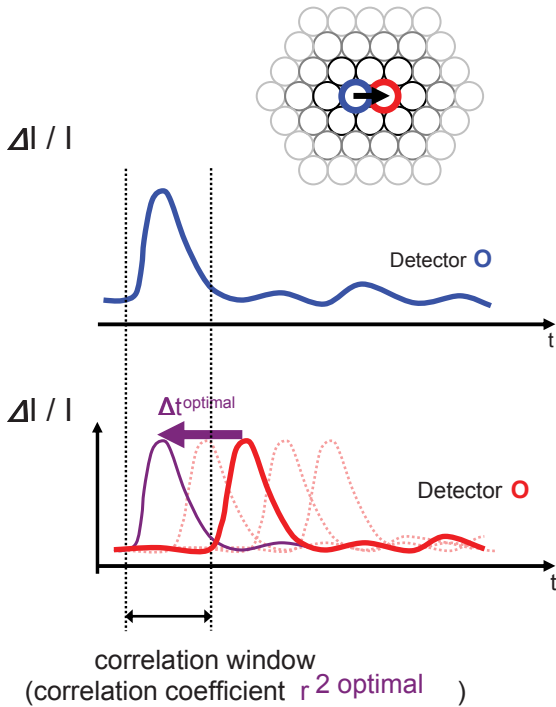

B

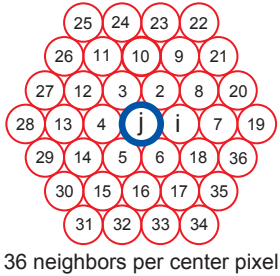

Supplement: NIHMS44620-supplement-03.pdf [file NIHMS44620-supplement-03.pdf]

# Supplemental Figure 3

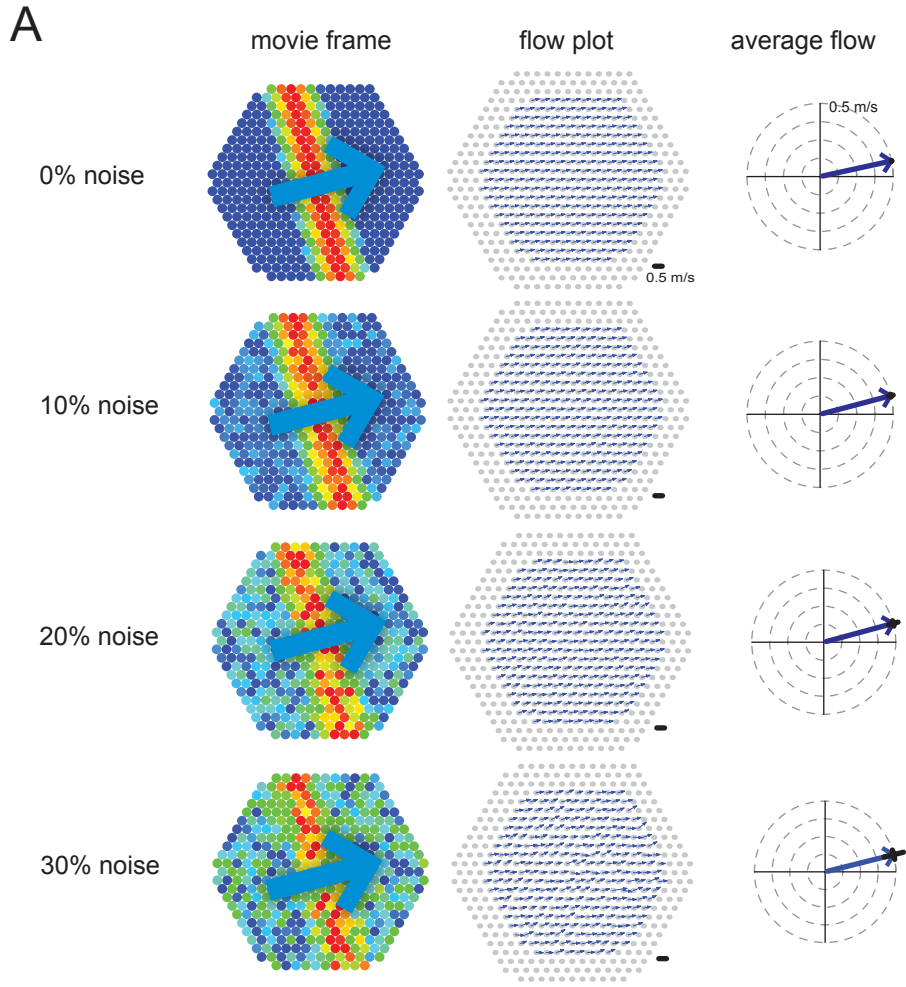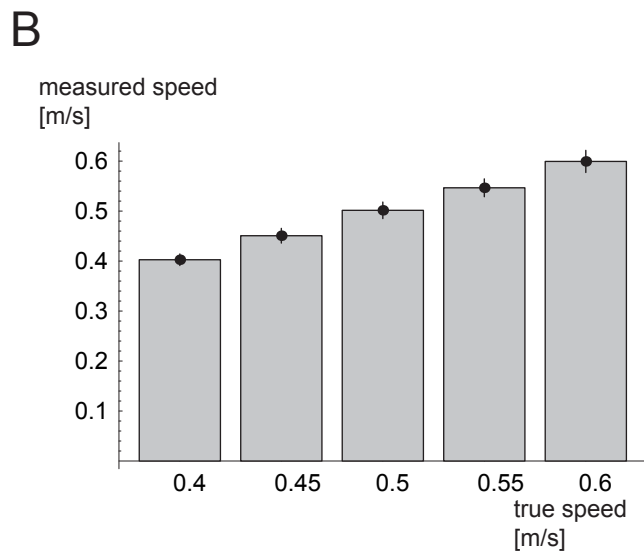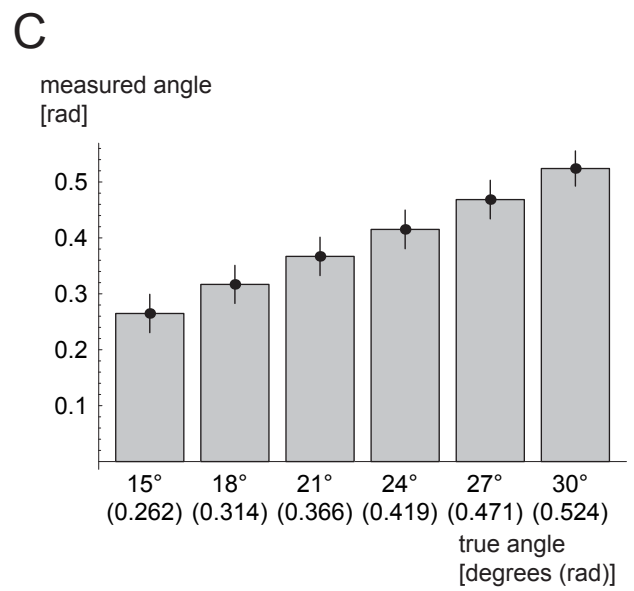

Supplement: NIHMS44620-supplement-04.pdf [file NIHMS44620-supplement-04.pdf]

# Supplemental Figure 4

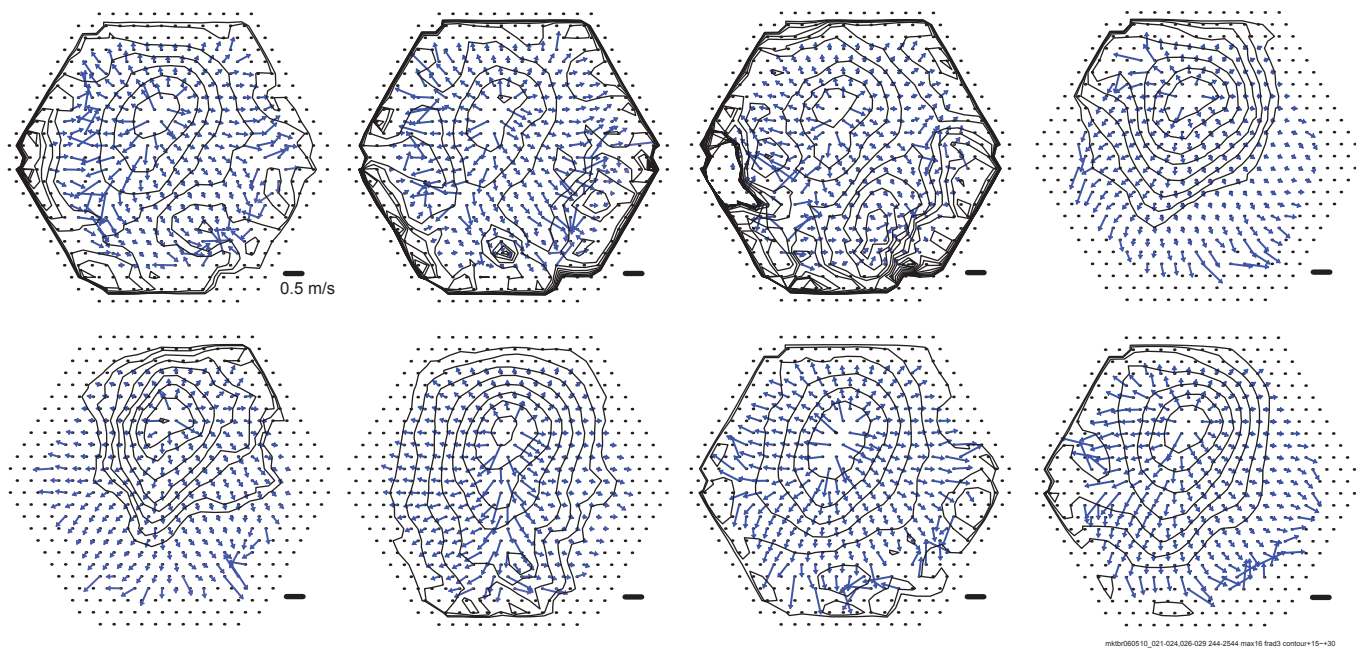

Supplement: NIHMS44620-supplement-05.pdf [file NIHMS44620-supplement-05.pdf]

# Supplemental Figure 5

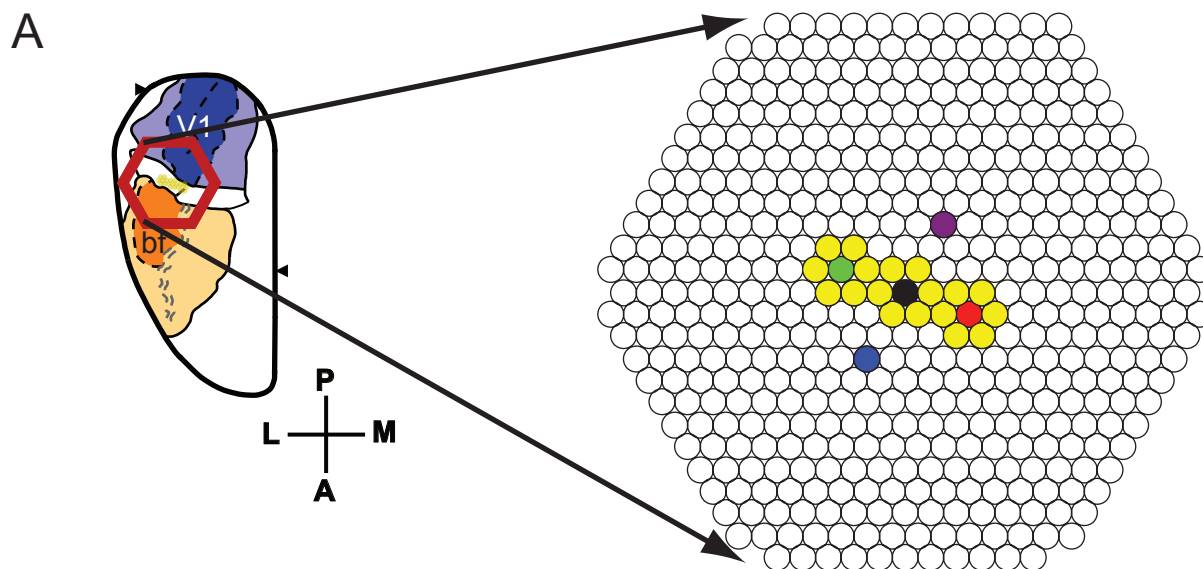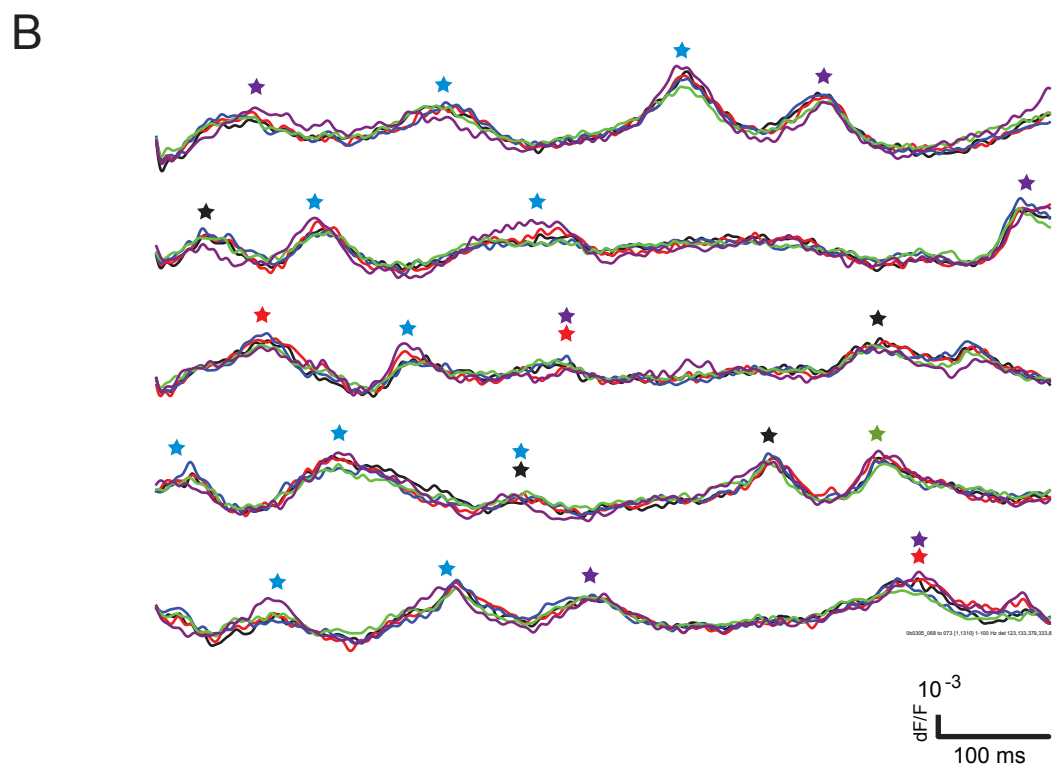

Supplement: NIHMS44620-supplement-06.pdf [file NIHMS44620-supplement-06.pdf]
